# Supplementary material
Source: PubMed Central journal article supplement (PMC4018049)
Supplement: ml200024y_si_001.pdf [file ml200024y_si_001.pdf]

## Supporting Information

### **Rigid Analogues of Antimitotic Indolobenzazepinones : New Insights into Tubulin Binding via Molecular Modeling**

Valérie Pons, Stéphane Beaumont, Marie Elise Tran Huu Dau, Bogdan I. Iorga and Robert H. Dodd\*

Institut de Chimie des Substances Naturelles, CNRS UPR 2301, Centre de Recherche de Gif-sur-Yvette,  
F-91198 Gif-sur-Yvette, France

e-mail : robert.dodd@icsn.cnrs-gif.fr

#### **Table of contents :**

|                                                                                     |    |
|-------------------------------------------------------------------------------------|----|
| Minimized conformations of compounds <i>aRR-4</i> , <i>aRR-5</i> and <i>aRR-6</i>   | S2 |
| Docked conformations of compounds <b>5</b> and <b>6</b> in the tubulin binding site | S3 |
| Representation of different binding sites in the X-ray structure of tubulin         | S5 |
| Theoretical data for compounds <b>4-6</b> and corresponding transition states       | S6 |

a

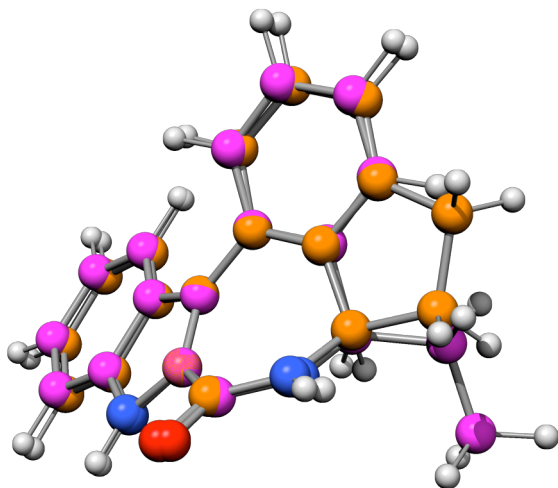

b

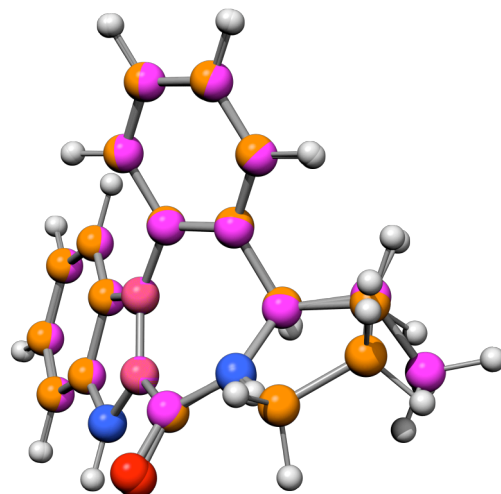

**Figure S1.** Superposition of the minimized conformations of *aRR-4* with *aRR-5* (a) and with *aRR-6* (b)

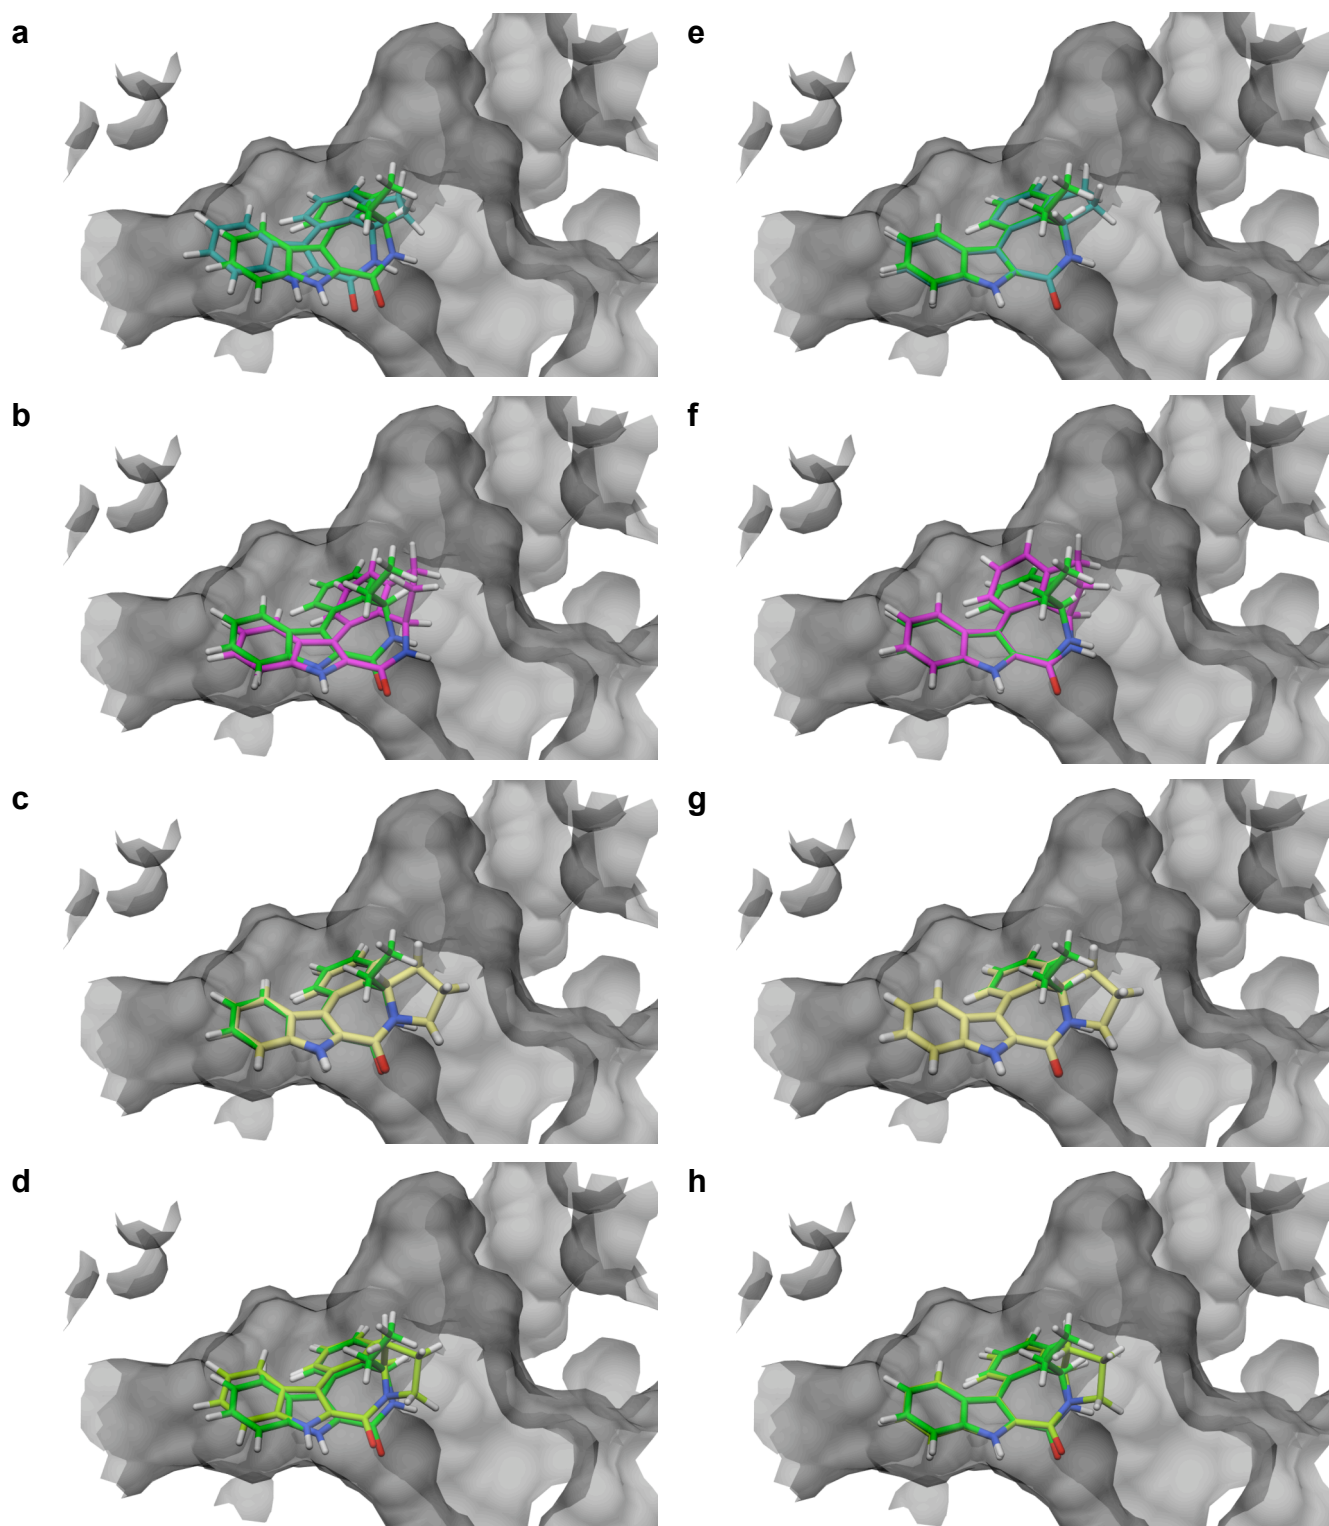

**Figure S2.** i) Left column : Docked conformations of compounds **5-aSS** (a), **5-aSR** (b), **6-aSS** (c) and **6-aSR** (d) in the tubulin binding site, and docked conformation of **4-aSR** (green) shown for comparison purposes ; ii) Right column : the same four compounds superimposed on **4-aSR** in order to identify potential steric clashes with the protein surface.

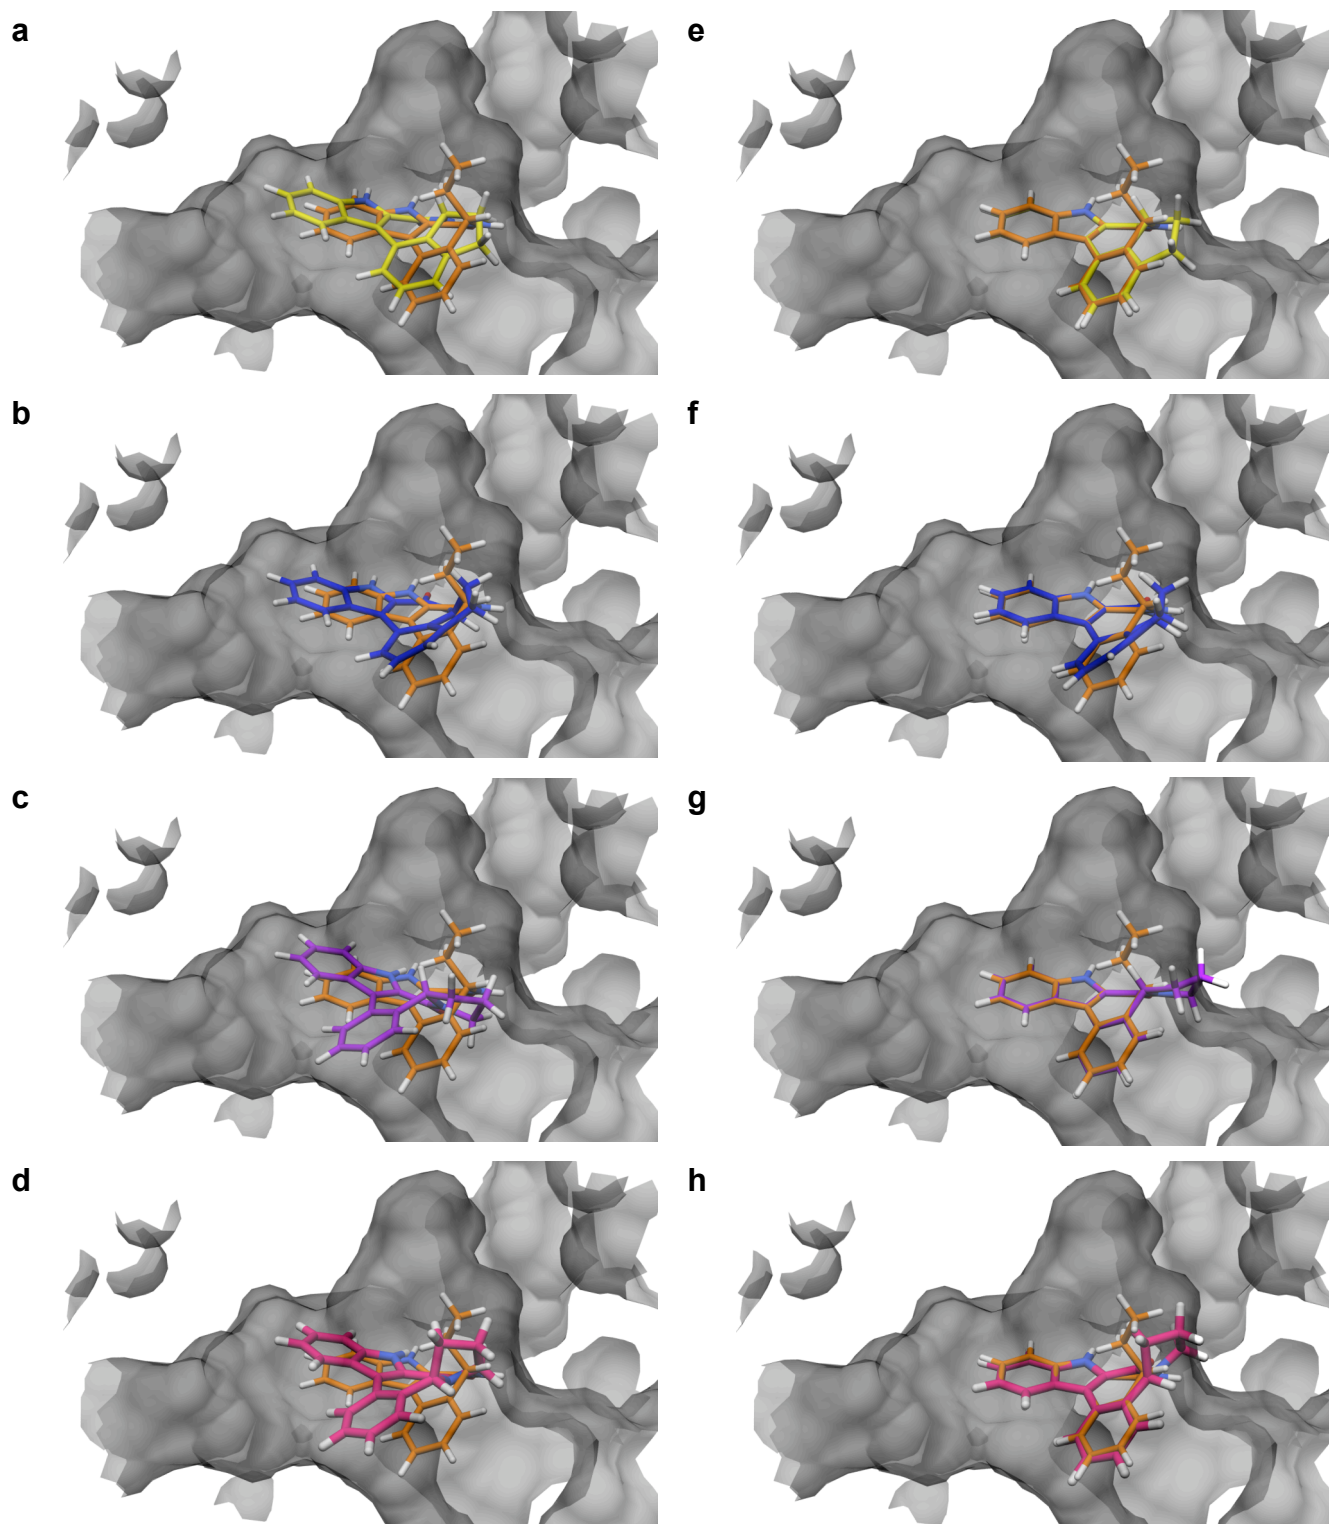

**Figure S3.** i) Left column : Docked conformations of compounds **5-aRR** (a), **5-aRS** (b), **6-aRR** (c) and **6-aRS** (d) in the tubulin binding site, with the docked conformation of **4-aRS** as reference (orange) ; ii) Right column : the same compounds superimposed on **4-aRS** in order to identify potential steric clashes with the protein surface.

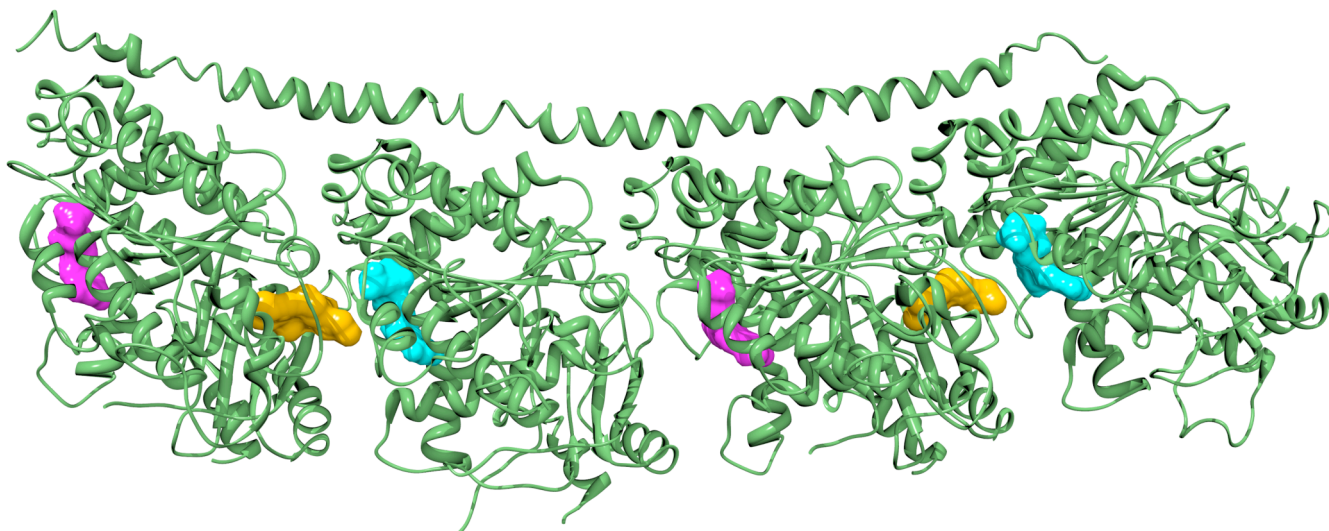

**Figure S4.** X-ray structure of tubulin (PDB code 1SA0) in a complex with DAMA-colchicine (orange), GDP (magenta) et GTP (cyan)

Theoretical data for compound 5-aRR :

Final Energy in Hartrees: HF = - 873.6395036 (HF/6-31+G(D,P))

Standard orientation:

| Center<br>Number | Atomic<br>Number | Atomic<br>Type | Coordinates (Angstroms) |           |           |
|------------------|------------------|----------------|-------------------------|-----------|-----------|
|                  |                  |                | X                       | Y         | Z         |
| 1                | 6                | 0              | -2.571454               | -1.784416 | 0.284644  |
| 2                | 6                | 0              | -3.932638               | -1.869472 | 0.443854  |
| 3                | 6                | 0              | -4.742818               | -0.717813 | 0.392662  |
| 4                | 6                | 0              | -4.197497               | 0.526346  | 0.201771  |
| 5                | 6                | 0              | -1.983304               | -0.527087 | 0.060245  |
| 6                | 6                | 0              | -2.808989               | 0.606180  | 0.044135  |
| 7                | 7                | 0              | -2.017715               | 1.699036  | -0.114807 |
| 8                | 6                | 0              | -0.712387               | 1.303625  | -0.202538 |
| 9                | 6                | 0              | -0.623202               | -0.057201 | -0.121633 |
| 10               | 6                | 0              | 0.283918                | 2.380176  | -0.414954 |
| 11               | 8                | 0              | -0.090420               | 3.465814  | -0.792319 |
| 12               | 7                | 0              | 1.586619                | 2.112989  | -0.183344 |
| 13               | 6                | 0              | 2.120857                | 1.048534  | 0.658400  |
| 14               | 6                | 0              | 1.841187                | -0.343125 | 0.141722  |
| 15               | 6                | 0              | 0.606432                | -0.863154 | -0.237040 |
| 16               | 6                | 0              | 3.663972                | 1.118502  | 0.663763  |
| 17               | 6                | 0              | 2.993530                | -1.110018 | 0.121472  |
| 18               | 6                | 0              | 2.962031                | -2.415486 | -0.341146 |
| 19               | 6                | 0              | 1.752686                | -2.927788 | -0.786730 |
| 20               | 6                | 0              | 0.592456                | -2.167593 | -0.733110 |
| 21               | 6                | 0              | 4.159155                | -0.339623 | 0.695804  |
| 22               | 1                | 0              | 2.163984                | 2.914656  | -0.315967 |
| 23               | 1                | 0              | -2.300298               | 2.643280  | -0.243470 |
| 24               | 1                | 0              | -1.972062               | -2.672218 | 0.350843  |
| 25               | 1                | 0              | -4.390467               | -2.826713 | 0.617541  |
| 26               | 1                | 0              | -5.806559               | -0.817348 | 0.516817  |
| 27               | 1                | 0              | -4.810842               | 1.409523  | 0.179667  |
| 28               | 1                | 0              | 1.728421                | 1.154184  | 1.669271  |
| 29               | 1                | 0              | 3.989111                | 1.581010  | -0.262821 |
| 30               | 1                | 0              | 4.045131                | 1.714846  | 1.484935  |
| 31               | 1                | 0              | 3.853183                | -3.018291 | -0.364048 |
| 32               | 1                | 0              | 1.706713                | -3.928667 | -1.178542 |
| 33               | 1                | 0              | -0.322278               | -2.588995 | -1.102903 |
| 34               | 1                | 0              | 4.356844                | -0.666908 | 1.713756  |
| 35               | 1                | 0              | 5.076534                | -0.472564 | 0.132607  |

|                | 1       | 2       | 3        |
|----------------|---------|---------|----------|
|                | A       | A       | A        |
| Frequencies -- | 56.2585 | 82.4238 | 100.1832 |
| Red. masses -- | 4.7799  | 4.0684  | 6.0807   |
| Frc consts --  | 0.0089  | 0.0163  | 0.0360   |
| IR Inten --    | 1.8140  | 0.1685  | 0.6466   |
| Raman Activ -- | 2.4979  | 1.6738  | 1.9717   |
| Depolar (P) -- | 0.6626  | 0.7331  | 0.7416   |
| Depolar (U) -- | 0.7970  | 0.8460  | 0.8517   |

## Theoretical data for compound 5-aSR :

Final Energy in Hartrees: HF = - 873.6234716 (HF/6-31+G(D,P))

Standard orientation:

| Center<br>Number | Atomic<br>Number | Atomic<br>Type | Coordinates (Angstroms) |           |           |
|------------------|------------------|----------------|-------------------------|-----------|-----------|
|                  |                  |                | X                       | Y         | Z         |
| 1                | 6                | 0              | 2.608419                | -1.784754 | 0.240992  |
| 2                | 6                | 0              | 3.973659                | -1.852035 | 0.367891  |
| 3                | 6                | 0              | 4.777597                | -0.704166 | 0.229329  |
| 4                | 6                | 0              | 4.214332                | 0.521233  | -0.011239 |
| 5                | 6                | 0              | 1.992024                | -0.544613 | -0.023117 |
| 6                | 6                | 0              | 2.819634                | 0.583519  | -0.117290 |
| 7                | 7                | 0              | 2.029299                | 1.669618  | -0.286215 |
| 8                | 6                | 0              | 0.716951                | 1.288220  | -0.268950 |
| 9                | 6                | 0              | 0.621306                | -0.079632 | -0.207892 |
| 10               | 6                | 0              | -0.217566               | 2.423955  | -0.048061 |
| 11               | 8                | 0              | 0.228589                | 3.546532  | -0.047891 |
| 12               | 7                | 0              | -1.504878               | 2.184151  | 0.297893  |
| 13               | 6                | 0              | -2.328634               | 1.113320  | -0.219844 |
| 14               | 6                | 0              | -0.615155               | -0.888506 | -0.113210 |
| 15               | 6                | 0              | -1.888967               | -0.321038 | -0.002723 |
| 16               | 6                | 0              | -3.027871               | -1.110614 | 0.088355  |
| 17               | 6                | 0              | -2.952711               | -2.489977 | -0.002436 |
| 18               | 6                | 0              | -1.715837               | -3.059327 | -0.248641 |
| 19               | 6                | 0              | -0.578804               | -2.269012 | -0.330091 |
| 20               | 6                | 0              | -4.280149               | -0.265958 | 0.165364  |
| 21               | 6                | 0              | -3.725563               | 1.143679  | 0.412774  |
| 22               | 1                | 0              | -1.990707               | 3.044632  | 0.439533  |
| 23               | 1                | 0              | 2.297310                | 2.626249  | -0.249881 |
| 24               | 1                | 0              | 2.038012                | -2.680111 | 0.379808  |
| 25               | 1                | 0              | 4.438801                | -2.797280 | 0.582890  |
| 26               | 1                | 0              | 5.845085                | -0.791293 | 0.327178  |
| 27               | 1                | 0              | 4.815118                | 1.408600  | -0.102120 |
| 28               | 1                | 0              | -2.433354               | 1.237481  | -1.300903 |
| 29               | 1                | 0              | -3.837065               | -3.099399 | 0.065279  |
| 30               | 1                | 0              | -1.628410               | -4.121700 | -0.393016 |
| 31               | 1                | 0              | 0.348746                | -2.746439 | -0.563403 |
| 32               | 1                | 0              | -4.959867               | -0.590310 | 0.945897  |
| 33               | 1                | 0              | -4.823751               | -0.312851 | -0.775973 |
| 34               | 1                | 0              | -3.614600               | 1.319292  | 1.478703  |
| 35               | 1                | 0              | -4.350974               | 1.928718  | 0.000130  |

|                | 1       | 2       | 3        |
|----------------|---------|---------|----------|
|                | A       | A       | A        |
| Frequencies -- | 33.4118 | 82.0824 | 102.4189 |
| Red. masses -- | 4.8225  | 4.2711  | 7.0762   |
| Frc consts --  | 0.0032  | 0.0170  | 0.0437   |
| IR Inten --    | 1.4047  | 0.1879  | 1.0739   |
| Raman Activ -- | 0.5736  | 1.2175  | 0.8854   |
| Depolar (P) -- | 0.6829  | 0.7348  | 0.7487   |
| Depolar (U) -- | 0.8116  | 0.8471  | 0.8563   |

Theoretical data for transition state TS-5-aSR-5-aRR :

Final Energy in Hartrees: HF = - 873.5958684 (HF/6-31+G(D,P))

Standard orientation:

| Center<br>Number | Atomic<br>Number | Atomic<br>Type | Coordinates (Angstroms) |           |           |
|------------------|------------------|----------------|-------------------------|-----------|-----------|
|                  |                  |                | X                       | Y         | Z         |
| 1                | 6                | 0              | -2.728075               | 1.642391  | 0.452757  |
| 2                | 6                | 0              | -4.102864               | 1.657608  | 0.464714  |
| 3                | 6                | 0              | -4.843417               | 0.496063  | 0.180447  |
| 4                | 6                | 0              | -4.216677               | -0.693873 | -0.100985 |
| 5                | 6                | 0              | -2.057810               | 0.447230  | 0.147335  |
| 6                | 6                | 0              | -2.820054               | -0.701285 | -0.109851 |
| 7                | 7                | 0              | -1.957876               | -1.741035 | -0.323276 |
| 8                | 6                | 0              | -0.676540               | -1.281089 | -0.199702 |
| 9                | 6                | 0              | -0.663133               | 0.050882  | 0.071047  |
| 10               | 6                | 0              | 0.484992                | -2.207509 | -0.327544 |
| 11               | 8                | 0              | 0.565561                | -2.992033 | -1.214521 |
| 12               | 7                | 0              | 1.419240                | -2.147482 | 0.740745  |
| 13               | 6                | 0              | 2.267011                | -0.957868 | 0.876625  |
| 14               | 6                | 0              | 0.556751                | 0.889981  | 0.018594  |
| 15               | 6                | 0              | 1.830155                | 0.375147  | 0.272496  |
| 16               | 6                | 0              | 2.971548                | 1.119811  | -0.004480 |
| 17               | 6                | 0              | 2.882224                | 2.419273  | -0.469678 |
| 18               | 6                | 0              | 1.622525                | 2.957371  | -0.685629 |
| 19               | 6                | 0              | 0.483470                | 2.199492  | -0.464424 |
| 20               | 6                | 0              | 4.221699                | 0.307793  | 0.258724  |
| 21               | 6                | 0              | 3.679298                | -1.128813 | 0.306040  |
| 22               | 1                | 0              | 0.892241                | -2.253198 | 1.584359  |
| 23               | 1                | 0              | -2.199137               | -2.664286 | -0.598227 |
| 24               | 1                | 0              | -2.182396               | 2.535107  | 0.694490  |
| 25               | 1                | 0              | -4.623372               | 2.568382  | 0.700666  |
| 26               | 1                | 0              | -5.917920               | 0.539546  | 0.192948  |
| 27               | 1                | 0              | -4.780113               | -1.587217 | -0.304936 |
| 28               | 1                | 0              | 2.360099                | -0.803367 | 1.949326  |
| 29               | 1                | 0              | 3.767566                | 2.993849  | -0.679900 |
| 30               | 1                | 0              | 1.522610                | 3.959060  | -1.065145 |
| 31               | 1                | 0              | -0.470922               | 2.617327  | -0.719446 |
| 32               | 1                | 0              | 4.980437                | 0.454541  | -0.502096 |
| 33               | 1                | 0              | 4.663007                | 0.585461  | 1.214919  |
| 34               | 1                | 0              | 3.608696                | -1.540009 | -0.696679 |
| 35               | 1                | 0              | 4.278557                | -1.804936 | 0.904687  |

|                | 1<br>A   | 2<br>A  | 3<br>A  |
|----------------|----------|---------|---------|
| Frequencies -- | -61.9481 | 46.3011 | 94.1083 |
| Red. masses -- | 5.9251   | 4.8604  | 5.1449  |
| Frc consts --  | 0.0134   | 0.0061  | 0.0268  |
| IR Inten --    | 1.5172   | 1.8189  | 1.4449  |
| Raman Activ -- | 2.2350   | 1.8818  | 2.9420  |
| Depolar (P) -- | 0.5104   | 0.6148  | 0.7173  |
| Depolar (U) -- | 0.6759   | 0.7615  | 0.8354  |



### Theoretical data for compound 6-aRR :

Final Energy in Hartrees: HF = - 912.6686034 (HF/6-31+G(D,P))

Standard orientation:

| Center Number | Atomic Number | Atomic Type | Coordinates (Angstroms) |           |           |
|---------------|---------------|-------------|-------------------------|-----------|-----------|
|               |               |             | X                       | Y         | Z         |
| 1             | 6             | 0           | 3.090993                | 1.307003  | 0.413456  |
| 2             | 6             | 0           | 4.433688                | 1.044857  | 0.542885  |
| 3             | 6             | 0           | 4.935234                | -0.261195 | 0.384216  |
| 4             | 6             | 0           | 4.099441                | -1.316416 | 0.113161  |
| 5             | 6             | 0           | 2.213179                | 0.252798  | 0.112773  |
| 6             | 6             | 0           | 2.733939                | -1.042958 | -0.014629 |
| 7             | 7             | 0           | 1.693629                | -1.893067 | -0.238570 |
| 8             | 6             | 0           | 0.529296                | -1.179590 | -0.258713 |
| 9             | 6             | 0           | 0.777047                | 0.147706  | -0.066455 |
| 10            | 6             | 0           | -0.727932               | -1.914288 | -0.533862 |
| 11            | 8             | 0           | -0.695670               | -2.975925 | -1.115686 |
| 12            | 7             | 0           | -1.860851               | -1.342846 | -0.098502 |
| 13            | 6             | 0           | -1.913474               | -0.263902 | 0.901124  |
| 14            | 6             | 0           | -1.534185               | 1.076513  | 0.289397  |
| 15            | 6             | 0           | -0.211228               | 1.244782  | -0.151362 |
| 16            | 6             | 0           | -3.336342               | -0.423598 | 1.458463  |
| 17            | 6             | 0           | -2.430822               | 2.128008  | 0.148300  |
| 18            | 6             | 0           | -2.046207               | 3.334820  | -0.415849 |
| 19            | 6             | 0           | -0.745861               | 3.498516  | -0.859662 |
| 20            | 6             | 0           | 0.158148                | 2.458243  | -0.730755 |
| 21            | 6             | 0           | -4.141354               | -1.003183 | 0.293285  |
| 22            | 6             | 0           | -3.153982               | -1.974093 | -0.349671 |
| 23            | 1             | 0           | 1.737108                | -2.859290 | -0.467345 |
| 24            | 1             | 0           | 2.723909                | 2.306152  | 0.557179  |
| 25            | 1             | 0           | 5.113880                | 1.844735  | 0.774656  |
| 26            | 1             | 0           | 5.991642                | -0.435057 | 0.487517  |
| 27            | 1             | 0           | 4.478675                | -2.317355 | 0.007636  |
| 28            | 1             | 0           | -1.191145               | -0.475051 | 1.681676  |
| 29            | 1             | 0           | -3.301509               | -1.149176 | 2.265751  |
| 30            | 1             | 0           | -3.743765               | 0.489301  | 1.869956  |
| 31            | 1             | 0           | -3.446652               | 2.018973  | 0.477264  |
| 32            | 1             | 0           | -2.760278               | 4.133313  | -0.511614 |
| 33            | 1             | 0           | -0.437152               | 4.423271  | -1.313839 |
| 34            | 1             | 0           | 1.154634                | 2.579083  | -1.111309 |
| 35            | 1             | 0           | -5.051296               | -1.496473 | 0.615006  |
| 36            | 1             | 0           | -4.414036               | -0.224034 | -0.411441 |
| 37            | 1             | 0           | -3.188602               | -2.953209 | 0.119059  |
| 38            | 1             | 0           | -3.306976               | -2.110530 | -1.411767 |

|                | 1       | 2       | 3       |
|----------------|---------|---------|---------|
|                | A       | A       | A       |
| Frequencies -- | 59.1014 | 82.6892 | 96.3385 |
| Red. masses -- | 5.1566  | 4.0363  | 4.8224  |
| Frc consts --  | 0.0106  | 0.0163  | 0.0264  |
| IR Inten --    | 1.8625  | 0.5471  | 0.1135  |
| Raman Activ -- | 2.7605  | 1.5943  | 3.2462  |
| Depolar (P) -- | 0.6944  | 0.7220  | 0.6596  |
| Depolar (U) -- | 0.8196  | 0.8385  | 0.7949  |

# Theoretical data for compound 6-aSR :

Final Energy in Hartrees: HF = - 912.6473596 (HF/6-31+G(D,P))

Standard orientation:

| Center<br>Number | Atomic<br>Number | Atomic<br>Type | Coordinates (Angstroms) |           |           |
|------------------|------------------|----------------|-------------------------|-----------|-----------|
|                  |                  |                | X                       | Y         | Z         |
| 1                | 6                | 0              | -2.983524               | 1.144271  | 0.597139  |
| 2                | 6                | 0              | -4.281745               | 0.758552  | 0.824166  |
| 3                | 6                | 0              | -4.708738               | -0.554179 | 0.540919  |
| 4                | 6                | 0              | -3.839070               | -1.494250 | 0.048874  |
| 5                | 6                | 0              | -2.071698               | 0.209805  | 0.075652  |
| 6                | 6                | 0              | -2.514691               | -1.097173 | -0.170490 |
| 7                | 7                | 0              | -1.451348               | -1.823566 | -0.599930 |
| 8                | 6                | 0              | -0.336723               | -1.028459 | -0.624499 |
| 9                | 6                | 0              | -0.661458               | 0.241495  | -0.260401 |
| 10               | 6                | 0              | 0.934628                | -1.741483 | -0.897739 |
| 11               | 8                | 0              | 0.857072                | -2.860984 | -1.347273 |
| 12               | 7                | 0              | 2.132011                | -1.187761 | -0.556398 |
| 13               | 6                | 0              | 2.353949                | -0.005448 | 0.291323  |
| 14               | 6                | 0              | 0.238645                | 1.406565  | -0.230115 |
| 15               | 6                | 0              | 1.608735                | 1.286276  | 0.016280  |
| 16               | 6                | 0              | 2.393443                | 2.439219  | -0.003515 |
| 17               | 6                | 0              | 1.862870                | 3.686440  | -0.278055 |
| 18               | 6                | 0              | 0.516698                | 3.793194  | -0.584591 |
| 19               | 6                | 0              | -0.274657               | 2.660604  | -0.573317 |
| 20               | 6                | 0              | 3.144675                | -2.130439 | -0.064123 |
| 21               | 6                | 0              | 2.376566                | -0.600544 | 1.707376  |
| 22               | 6                | 0              | 3.117941                | -1.941354 | 1.478204  |
| 23               | 1                | 0              | -1.427693               | -2.782996 | -0.857501 |
| 24               | 1                | 0              | -2.674646               | 2.144286  | 0.836774  |
| 25               | 1                | 0              | -4.985052               | 1.464174  | 1.228586  |
| 26               | 1                | 0              | -5.733538               | -0.824517 | 0.724248  |
| 27               | 1                | 0              | -4.158587               | -2.500883 | -0.154341 |
| 28               | 1                | 0              | 3.383868                | 0.245741  | 0.067804  |
| 29               | 1                | 0              | 3.448857                | 2.356794  | 0.189818  |
| 30               | 1                | 0              | 2.498236                | 4.553882  | -0.281307 |
| 31               | 1                | 0              | 0.088435                | 4.744435  | -0.846013 |
| 32               | 1                | 0              | -1.307765               | 2.742771  | -0.851092 |
| 33               | 1                | 0              | 4.124213                | -1.917454 | 1.882678  |
| 34               | 1                | 0              | 2.597847                | -2.764277 | 1.954984  |
| 35               | 1                | 0              | 2.909163                | -3.130382 | -0.383929 |
| 36               | 1                | 0              | 4.107991                | -1.854733 | -0.477579 |
| 37               | 1                | 0              | 2.885115                | 0.050989  | 2.409082  |
| 38               | 1                | 0              | 1.367250                | -0.759215 | 2.071743  |

|                | 1       | 2       | 3       |
|----------------|---------|---------|---------|
|                | A       | A       | A       |
| Frequencies -- | 43.8089 | 75.9148 | 92.6179 |
| Red. masses -- | 4.5584  | 3.9920  | 4.5953  |
| Frc consts --  | 0.0052  | 0.0136  | 0.0232  |
| IR Inten --    | 1.6041  | 0.1916  | 1.2054  |
| Raman Activ -- | 3.0481  | 2.1709  | 2.3524  |
| Depolar (P) -- | 0.6804  | 0.7136  | 0.7404  |
| Depolar (U) -- | 0.8098  | 0.8329  | 0.8508  |

Theoretical data for transition state TS-6-aSR-6-aRR :

Final Energy in Hartrees: HF = - 912.6429966 (HF /6-31+G(D,P))

Standard orientation:

| Center Number | Atomic Number | Atomic Type | Coordinates (Angstroms) |           |           |
|---------------|---------------|-------------|-------------------------|-----------|-----------|
|               |               |             | X                       | Y         | Z         |
| 1             | 6             | 0           | -3.209255               | 1.152577  | 0.429322  |
| 2             | 6             | 0           | -4.530992               | 0.790550  | 0.519779  |
| 3             | 6             | 0           | -4.948009               | -0.527543 | 0.259138  |
| 4             | 6             | 0           | -4.033762               | -1.495351 | -0.062894 |
| 5             | 6             | 0           | -2.239176               | 0.196021  | 0.060844  |
| 6             | 6             | 0           | -2.687845               | -1.119034 | -0.138176 |
| 7             | 7             | 0           | -1.608286               | -1.902007 | -0.368333 |
| 8             | 6             | 0           | -0.475567               | -1.145227 | -0.305145 |
| 9             | 6             | 0           | -0.782475               | 0.167552  | -0.095570 |
| 10            | 6             | 0           | 0.771342                | -1.940870 | -0.272686 |
| 11            | 8             | 0           | 0.668579                | -3.145751 | -0.369487 |
| 12            | 7             | 0           | 1.952038                | -1.365904 | 0.006886  |
| 13            | 6             | 0           | 2.450184                | -0.010383 | -0.250671 |
| 14            | 6             | 0           | 1.558337                | 1.229714  | -0.111044 |
| 15            | 6             | 0           | 0.154217                | 1.318304  | -0.110049 |
| 16            | 6             | 0           | 3.686978                | -0.001180 | 0.667003  |
| 17            | 6             | 0           | 2.291007                | 2.421570  | -0.148823 |
| 18            | 6             | 0           | 1.708504                | 3.671268  | -0.189475 |
| 19            | 6             | 0           | 0.330328                | 3.758064  | -0.233104 |
| 20            | 6             | 0           | -0.412220               | 2.597814  | -0.205530 |
| 21            | 6             | 0           | 4.281985                | -1.392391 | 0.472990  |
| 22            | 6             | 0           | 3.069145                | -2.294047 | 0.232693  |
| 23            | 1             | 0           | -1.574349               | -2.893383 | -0.431180 |
| 24            | 1             | 0           | -2.947596               | 2.158946  | 0.683265  |
| 25            | 1             | 0           | -5.259889               | 1.526703  | 0.807791  |
| 26            | 1             | 0           | -5.991167               | -0.778730 | 0.332428  |
| 27            | 1             | 0           | -4.330547               | -2.513951 | -0.239390 |
| 28            | 1             | 0           | 2.803388                | 0.010165  | -1.283781 |
| 29            | 1             | 0           | 4.398807                | 0.773142  | 0.421970  |
| 30            | 1             | 0           | 3.359344                | 0.149359  | 1.690993  |
| 31            | 1             | 0           | 3.361429                | 2.377147  | -0.174081 |
| 32            | 1             | 0           | 2.324418                | 4.552204  | -0.215859 |
| 33            | 1             | 0           | -0.164577               | 4.709847  | -0.307465 |
| 34            | 1             | 0           | -1.469313               | 2.686835  | -0.305998 |
| 35            | 1             | 0           | 4.936970                | -1.398129 | -0.392693 |
| 36            | 1             | 0           | 4.868066                | -1.715934 | 1.324975  |
| 37            | 1             | 0           | 3.199561                | -2.948025 | -0.620455 |
| 38            | 1             | 0           | 2.834199                | -2.919271 | 1.083902  |

|                | 1        | 2       | 3       |
|----------------|----------|---------|---------|
|                | A        | A       | A       |
| Frequencies -- | -45.2695 | 55.0789 | 64.5995 |
| Red. masses -- | 3.4149   | 4.1182  | 3.8350  |
| Frc consts --  | 0.0041   | 0.0074  | 0.0094  |
| IR Inten --    | 0.8937   | 0.5008  | 0.1079  |
| Raman Activ -- | 0.4907   | 0.9488  | 2.1462  |
| Depolar (P) -- | 0.6819   | 0.7412  | 0.7487  |
| Depolar (U) -- | 0.8109   | 0.8514  | 0.8563  |

### Theoretical data for compound 4-aRR :

Final Energy in Hartrees: HF = - 874.8004089 (HF/6-31+G(D,P))

Standard orientation:

| Center<br>Number | Atomic<br>Number | Atomic<br>Type | Coordinates (Angstroms) |           |           |
|------------------|------------------|----------------|-------------------------|-----------|-----------|
|                  |                  |                | X                       | Y         | Z         |
| 1                | 6                | 0              | 2.796793                | 1.362202  | 0.675360  |
| 2                | 6                | 0              | 4.136249                | 1.162611  | 0.906287  |
| 3                | 6                | 0              | 4.736126                | -0.086799 | 0.655846  |
| 4                | 6                | 0              | 4.001372                | -1.149094 | 0.190747  |
| 5                | 6                | 0              | 2.022394                | 0.301537  | 0.177023  |
| 6                | 6                | 0              | 2.637651                | -0.939814 | -0.039860 |
| 7                | 7                | 0              | 1.681754                | -1.815478 | -0.456788 |
| 8                | 6                | 0              | 0.479242                | -1.169787 | -0.512005 |
| 9                | 6                | 0              | 0.619034                | 0.138182  | -0.151923 |
| 10               | 6                | 0              | -0.699796               | -1.927294 | -0.988171 |
| 11               | 8                | 0              | -0.561581               | -2.905456 | -1.684200 |
| 12               | 7                | 0              | -1.900749               | -1.464970 | -0.593495 |
| 13               | 6                | 0              | -2.126158               | -0.524252 | 0.503978  |
| 14               | 6                | 0              | -1.771801               | 0.893172  | 0.075366  |
| 15               | 6                | 0              | -0.428477               | 1.181410  | -0.215036 |
| 16               | 6                | 0              | -3.546372               | -0.715622 | 1.042059  |
| 17               | 6                | 0              | -2.720657               | 1.900609  | -0.046766 |
| 18               | 6                | 0              | -2.366598               | 3.180538  | -0.445450 |
| 19               | 6                | 0              | -1.044562               | 3.464174  | -0.739598 |
| 20               | 6                | 0              | -0.088788               | 2.469003  | -0.628729 |
| 21               | 6                | 0              | -3.769116               | -2.081034 | 1.695516  |
| 22               | 1                | 0              | -2.676790               | -1.962034 | -0.971066 |
| 23               | 1                | 0              | 1.811286                | -2.745553 | -0.782336 |
| 24               | 1                | 0              | 2.351888                | 2.315938  | 0.890166  |
| 25               | 1                | 0              | 4.737851                | 1.967236  | 1.289377  |
| 26               | 1                | 0              | 5.787964                | -0.211717 | 0.842658  |
| 27               | 1                | 0              | 4.454839                | -2.108229 | 0.014176  |
| 28               | 1                | 0              | -1.443217               | -0.790013 | 1.305528  |
| 29               | 1                | 0              | -4.269217               | -0.567003 | 0.242589  |
| 30               | 1                | 0              | -3.732935               | 0.057033  | 1.779975  |
| 31               | 1                | 0              | -3.752458               | 1.697820  | 0.168839  |
| 32               | 1                | 0              | -3.120242               | 3.943013  | -0.530784 |
| 33               | 1                | 0              | -0.757595               | 4.448236  | -1.065170 |
| 34               | 1                | 0              | 0.928053                | 2.686202  | -0.895761 |
| 35               | 1                | 0              | -4.778916               | -2.148151 | 2.087329  |
| 36               | 1                | 0              | -3.632087               | -2.901514 | 0.999465  |
| 37               | 1                | 0              | -3.082021               | -2.232931 | 2.522734  |

|                | 1       | 2       | 3       |
|----------------|---------|---------|---------|
|                | A       | A       | A       |
| Frequencies -- | 52.4155 | 80.6625 | 98.3238 |
| Red. masses -- | 4.7386  | 4.2034  | 5.7476  |
| Frc consts --  | 0.0077  | 0.0161  | 0.0327  |
| IR Inten --    | 0.9051  | 0.5968  | 0.3558  |
| Raman Activ -- | 3.6195  | 2.3291  | 2.7604  |
| Depolar (P) -- | 0.7060  | 0.7488  | 0.7082  |
| Depolar (U) -- | 0.8277  | 0.8563  | 0.8292  |

Theoretical data for compound 4-aSR :

Final Energy in Hartrees: HF = - 874.8001742 (HF/6-31+G(D,P))

Standard orientation:

| Center Number | Atomic Number | Atomic Type | Coordinates (Angstroms) |           |           |
|---------------|---------------|-------------|-------------------------|-----------|-----------|
|               |               |             | X                       | Y         | Z         |
| 1             | 6             | 0           | -2.540266               | 1.546561  | 0.622533  |
| 2             | 6             | 0           | -3.890395               | 1.429692  | 0.845890  |
| 3             | 6             | 0           | -4.574624               | 0.235703  | 0.545045  |
| 4             | 6             | 0           | -3.912712               | -0.854690 | 0.039105  |
| 5             | 6             | 0           | -1.837165               | 0.456907  | 0.080137  |
| 6             | 6             | 0           | -2.536425               | -0.730669 | -0.180950 |
| 7             | 7             | 0           | -1.642576               | -1.654563 | -0.624705 |
| 8             | 6             | 0           | -0.397324               | -1.092558 | -0.657576 |
| 9             | 6             | 0           | -0.447463               | 0.207600  | -0.255414 |
| 10            | 6             | 0           | 0.718669                | -1.949500 | -1.110138 |
| 11            | 8             | 0           | 0.488991                | -2.943662 | -1.758981 |
| 12            | 7             | 0           | 1.969433                | -1.586823 | -0.763745 |
| 13            | 6             | 0           | 2.386419                | -0.662305 | 0.291960  |
| 14            | 6             | 0           | 1.997096                | 0.776971  | -0.006457 |
| 15            | 6             | 0           | 0.673746                | 1.171075  | -0.248224 |
| 16            | 6             | 0           | 1.997417                | -1.113715 | 1.712643  |
| 17            | 6             | 0           | 3.004859                | 1.734383  | -0.032661 |
| 18            | 6             | 0           | 2.736513                | 3.067623  | -0.295384 |
| 19            | 6             | 0           | 1.434583                | 3.454805  | -0.561110 |
| 20            | 6             | 0           | 0.421503                | 2.512239  | -0.542175 |
| 21            | 6             | 0           | 2.522895                | -2.503112 | 2.071804  |
| 22            | 1             | 0           | 2.659543                | -2.215474 | -1.110756 |
| 23            | 1             | 0           | -1.829871               | -2.568315 | -0.968095 |
| 24            | 1             | 0           | -2.034484               | 2.458274  | 0.879015  |
| 25            | 1             | 0           | -4.435741               | 2.257393  | 1.262532  |
| 26            | 1             | 0           | -5.633094               | 0.176129  | 0.726521  |
| 27            | 1             | 0           | -4.429225               | -1.773427 | -0.175005 |
| 28            | 1             | 0           | 3.467562                | -0.697631 | 0.243768  |
| 29            | 1             | 0           | 0.921685                | -1.080914 | 1.839145  |
| 30            | 1             | 0           | 2.410698                | -0.380779 | 2.400387  |
| 31            | 1             | 0           | 4.020994                | 1.432041  | 0.153986  |
| 32            | 1             | 0           | 3.535651                | 3.787085  | -0.306424 |
| 33            | 1             | 0           | 1.206719                | 4.479832  | -0.793590 |
| 34            | 1             | 0           | -0.577487               | 2.816597  | -0.788608 |
| 35            | 1             | 0           | 2.278036                | -2.744651 | 3.101134  |
| 36            | 1             | 0           | 2.090521                | -3.273108 | 1.441773  |
| 37            | 1             | 0           | 3.604599                | -2.556114 | 1.971048  |

|                | 1       | 2       | 3       |
|----------------|---------|---------|---------|
|                | A       | A       | A       |
| Frequencies -- | 50.6530 | 73.7464 | 87.0924 |
| Red. masses -- | 4.3435  | 3.8583  | 3.2548  |
| Frc consts --  | 0.0066  | 0.0124  | 0.0145  |
| IR Inten --    | 0.7293  | 0.0649  | 1.1401  |
| Raman Activ -- | 3.1283  | 2.9578  | 0.8659  |
| Depolar (P) -- | 0.6870  | 0.7466  | 0.7117  |
| Depolar (U) -- | 0.8145  | 0.8549  | 0.8316  |

Theoretical data for transition state **TS-4-aSR-4-aRR** :

Final Energy in Hartrees: HF = - 874.7735554 (HF/6-31+G(D,P))

Standard orientation:

| Center Number | Atomic Number | Atomic Type | Coordinates (Angstroms) |           |           |
|---------------|---------------|-------------|-------------------------|-----------|-----------|
|               |               |             | X                       | Y         | Z         |
| 1             | 6             | 0           | 2.970627                | 1.375211  | 0.133151  |
| 2             | 6             | 0           | 4.329382                | 1.189047  | 0.201940  |
| 3             | 6             | 0           | 4.894723                | -0.097752 | 0.121673  |
| 4             | 6             | 0           | 4.098850                | -1.206872 | 0.002770  |
| 5             | 6             | 0           | 2.120144                | 0.262887  | -0.029054 |
| 6             | 6             | 0           | 2.714277                | -1.008797 | -0.053923 |
| 7             | 7             | 0           | 1.724951                | -1.933195 | -0.101997 |
| 8             | 6             | 0           | 0.517455                | -1.299771 | -0.102389 |
| 9             | 6             | 0           | 0.676326                | 0.050376  | -0.099659 |
| 10            | 6             | 0           | -0.656160               | -2.181624 | -0.023315 |
| 11            | 8             | 0           | -0.492115               | -3.377445 | -0.141676 |
| 12            | 7             | 0           | -1.879734               | -1.687735 | 0.213991  |
| 13            | 6             | 0           | -2.506463               | -0.393914 | 0.480369  |
| 14            | 6             | 0           | -1.716410               | 0.908971  | 0.261843  |
| 15            | 6             | 0           | -0.379059               | 1.089506  | -0.128769 |
| 16            | 6             | 0           | -3.792163               | -0.381806 | -0.390088 |
| 17            | 6             | 0           | -2.485719               | 2.059726  | 0.474670  |
| 18            | 6             | 0           | -2.044404               | 3.331231  | 0.175360  |
| 19            | 6             | 0           | -0.791365               | 3.484017  | -0.393072 |
| 20            | 6             | 0           | 0.015852                | 2.376403  | -0.526350 |
| 21            | 6             | 0           | -4.784918               | -1.508996 | -0.087492 |
| 22            | 1             | 0           | -2.522631               | -2.444055 | 0.285191  |
| 23            | 1             | 0           | 1.806305                | -2.923739 | -0.112059 |
| 24            | 1             | 0           | 2.582127                | 2.368430  | 0.234729  |
| 25            | 1             | 0           | 4.973945                | 2.040099  | 0.329944  |
| 26            | 1             | 0           | 5.963147                | -0.210295 | 0.171960  |
| 27            | 1             | 0           | 4.516526                | -2.197302 | -0.033212 |
| 28            | 1             | 0           | -2.809353               | -0.401746 | 1.526030  |
| 29            | 1             | 0           | -3.488088               | -0.421568 | -1.432034 |
| 30            | 1             | 0           | -4.313455               | 0.553401  | -0.253528 |
| 31            | 1             | 0           | -3.471178               | 1.958157  | 0.888621  |
| 32            | 1             | 0           | -2.680542               | 4.178792  | 0.356895  |
| 33            | 1             | 0           | -0.438281               | 4.449864  | -0.707330 |
| 34            | 1             | 0           | 0.984318                | 2.500104  | -0.962877 |
| 35            | 1             | 0           | -5.712363               | -1.328824 | -0.620972 |
| 36            | 1             | 0           | -4.433998               | -2.486660 | -0.400696 |
| 37            | 1             | 0           | -5.021912               | -1.555644 | 0.972794  |

|                | 1<br>A   | 2<br>A  | 3<br>A  |
|----------------|----------|---------|---------|
| Frequencies -- | -77.7639 | 48.3497 | 73.3962 |
| Red. masses -- | 3.5701   | 4.4888  | 2.1773  |
| Frc consts --  | 0.0127   | 0.0062  | 0.0069  |
| IR Inten --    | 0.4427   | 0.3561  | 0.1192  |
| Raman Activ -- | 0.3704   | 1.3923  | 0.3214  |
| Depolar (P) -- | 0.5955   | 0.6794  | 0.6101  |
| Depolar (U) -- | 0.7464   | 0.8091  | 0.7578  |
